# Supplementary material
Source: Springer Nature journal article supplement (https://www.springermedizin.de/resource/supplementary/13058_2012_3139_MOESM10_ESM.pdf/9703336)
Supplement: MOESM10 [file 9703336]

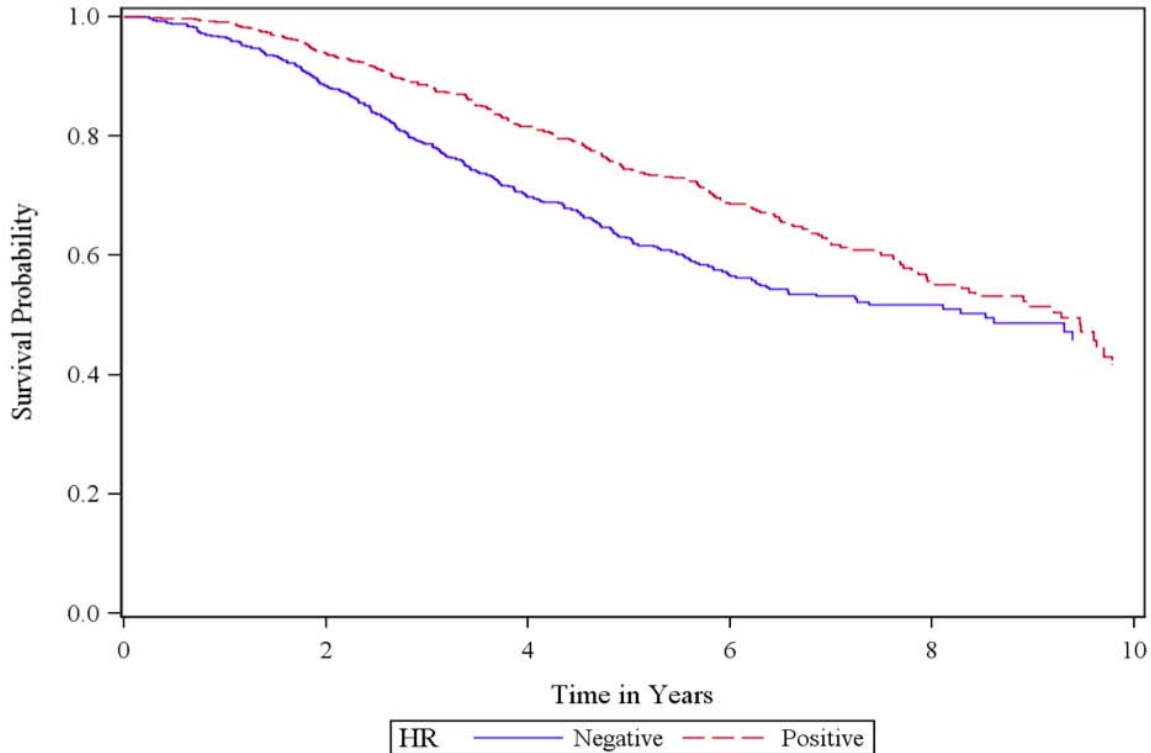

**Number at risk**

|                    |       |       |       |     |     |     |
|--------------------|-------|-------|-------|-----|-----|-----|
| <b>HR-positive</b> | 2,015 | 1,924 | 1,391 | 756 | 308 | 100 |
| <b>HR-negative</b> | 1,379 | 1,280 | 910   | 475 | 256 | 77  |

**Hazard Ratio (95% CI)**

***P*-val**

**HR-negative vs. HR-positive**

|                    |                   |       |
|--------------------|-------------------|-------|
| <b>0-2 years</b>   | 1.92 (1.28, 2.86) | 0.002 |
| <b>2-5 years</b>   | 1.55 (1.19, 2.00) | 0.001 |
| <b>&gt;5 years</b> | 0.81 (0.55, 1.19) | 0.285 |
